# Supplementary material for: Ag-Doping Effect on MnO2 Cathodes for Flexible Quasi-Solid-State Zinc-Ion Batteries
Source: MDPI journal article supplement (doi:10.3390/batteries8120267), 2022-12-02
Supplement: s1 [file s1]

## Electronic Supplementary Information

### Ag-doping effect on MnO<sub>2</sub> cathodes for flexible quasi-solid-state zinc-ion batteries

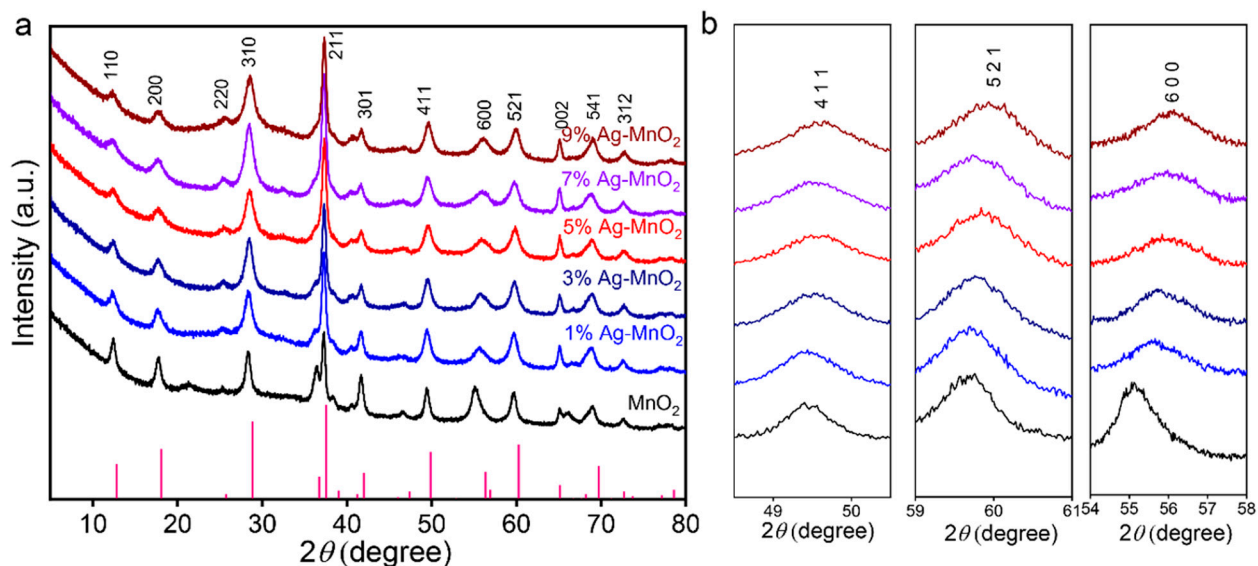

**Figure S1.** (a) XRD patterns of pure MnO<sub>2</sub> and Ag-doped MnO<sub>2</sub>, and (b) the enlarged view of 411, 521, 600 diffraction peaks.

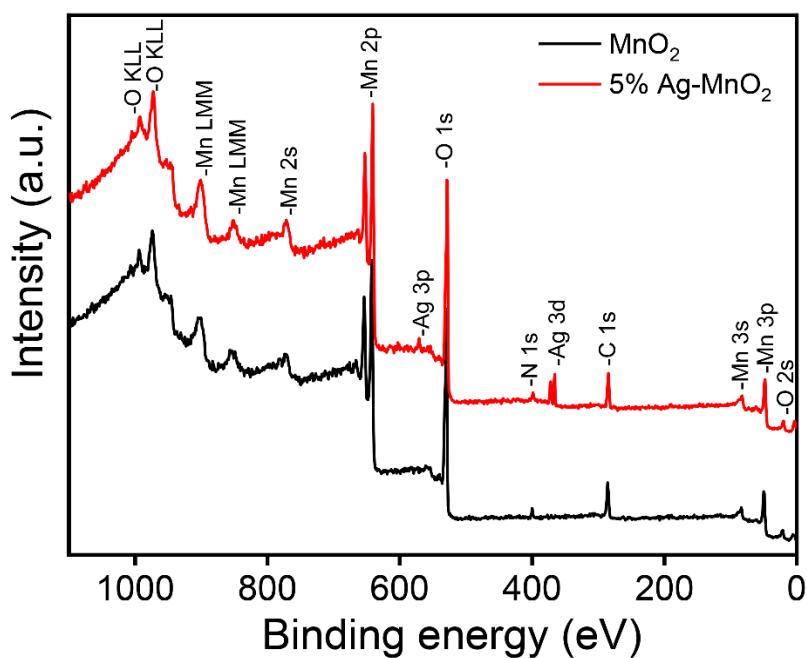

**Figure S2.** XPS survey spectrum of pure MnO<sub>2</sub> and 5%Ag-MnO<sub>2</sub>.

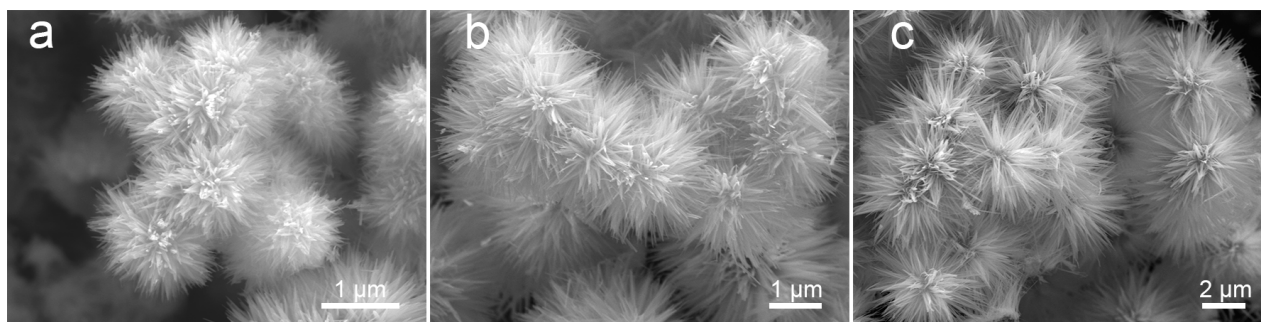

**Figure S3.** FESEM images of 5%Ag-MnO<sub>2</sub> synthesized at different reaction time of (a) 1, (b) 2, and (c) 4 h.

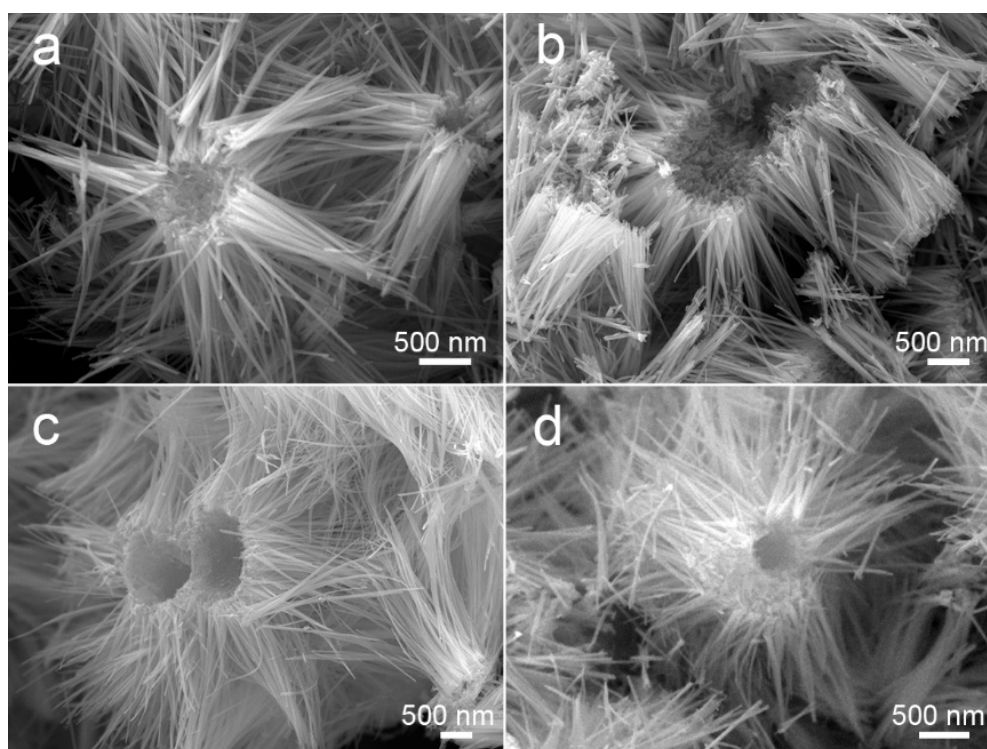

**Figure S4.** FESEM images of (a) 1%Ag-MnO<sub>2</sub>, (b) 3%Ag-MnO<sub>2</sub>, (c) 7%Ag-MnO<sub>2</sub>, (d) 9%Ag-MnO<sub>2</sub>.

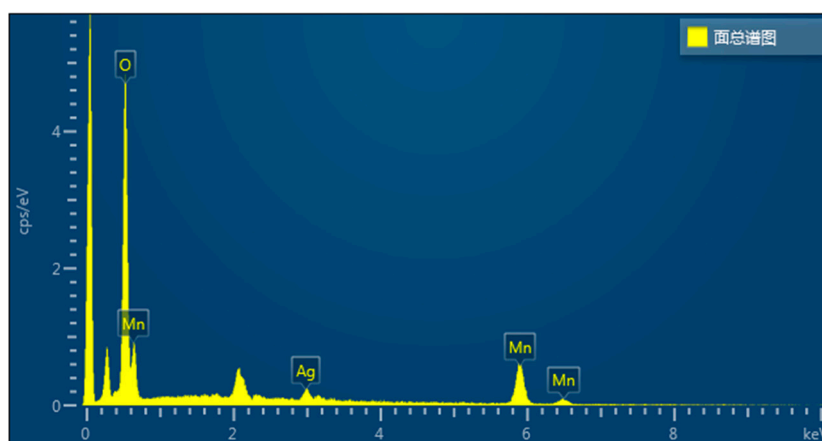

**Figure S5.** EDS spectrum of 5%Ag-MnO<sub>2</sub>.

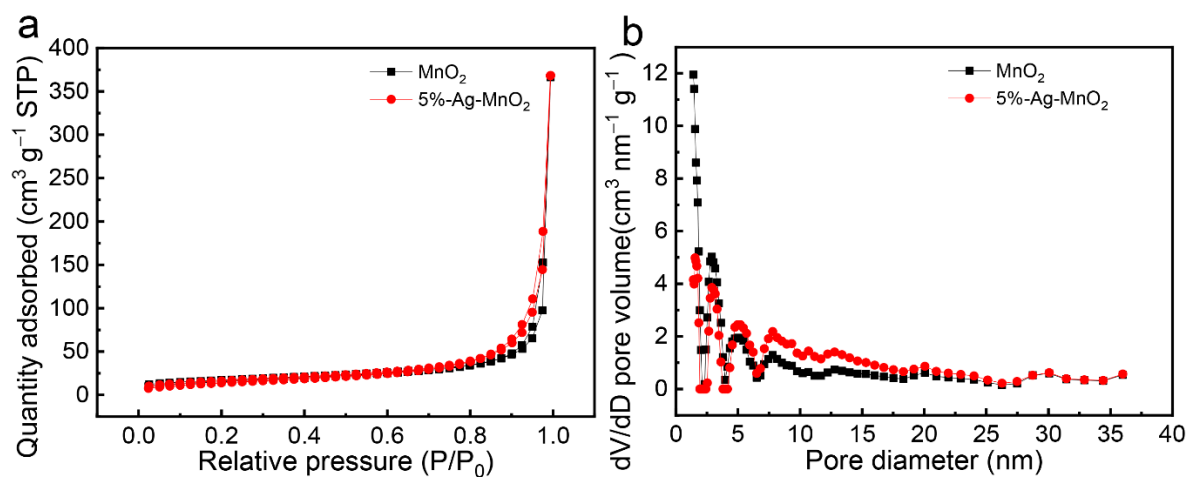

**Figure S6.** (a) N<sub>2</sub> adsorption–desorption isotherms and (b) pore size distribution curves of pure MnO<sub>2</sub> and 5%Ag-MnO<sub>2</sub>.

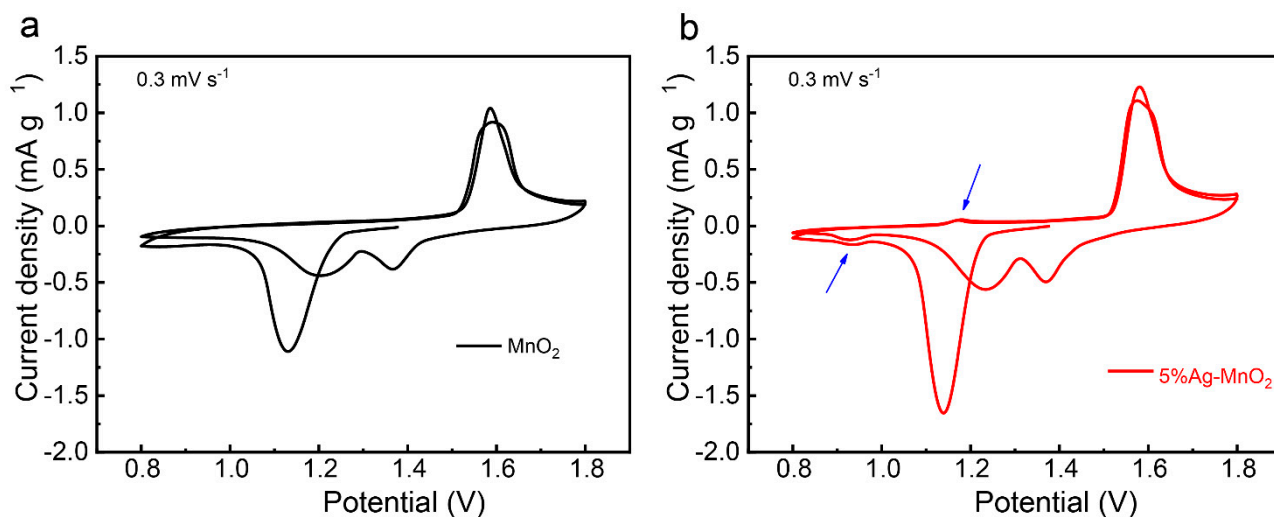

**Figure S7.** CV curves at a scan rate of 0.3 mV s<sup>-1</sup> of ZIBs based on (a) pure MnO<sub>2</sub> and (b) 5% Ag-MnO<sub>2</sub>.

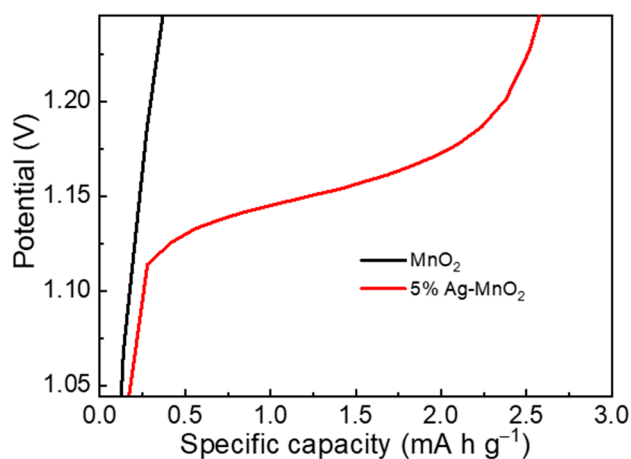

**Figure S8.** Galvanostatic charge curves of pure MnO<sub>2</sub> and 5%Ag-MnO<sub>2</sub> around 1.15 V.

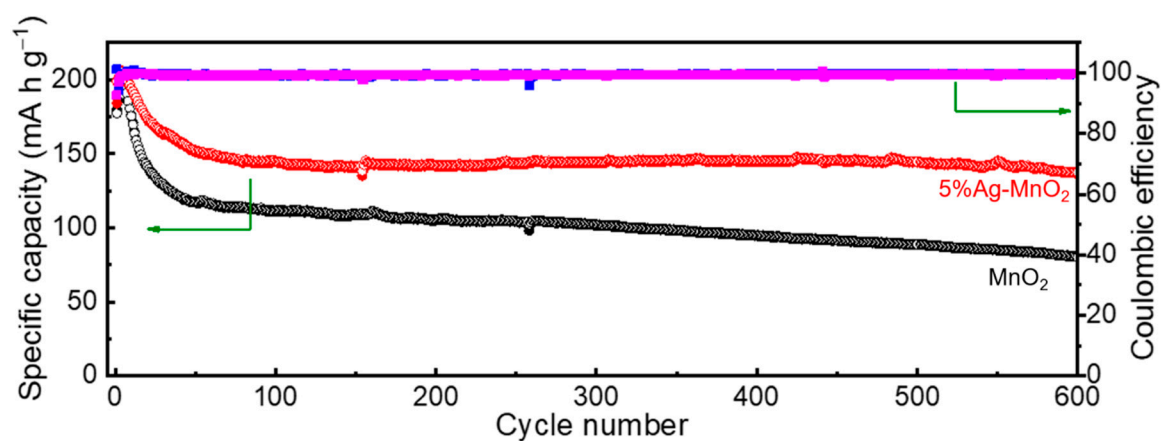

**Figure S9.** Long-term cycling performance of pure MnO<sub>2</sub> and 5%Ag-MnO<sub>2</sub> at 0.8 A g<sup>-1</sup>.

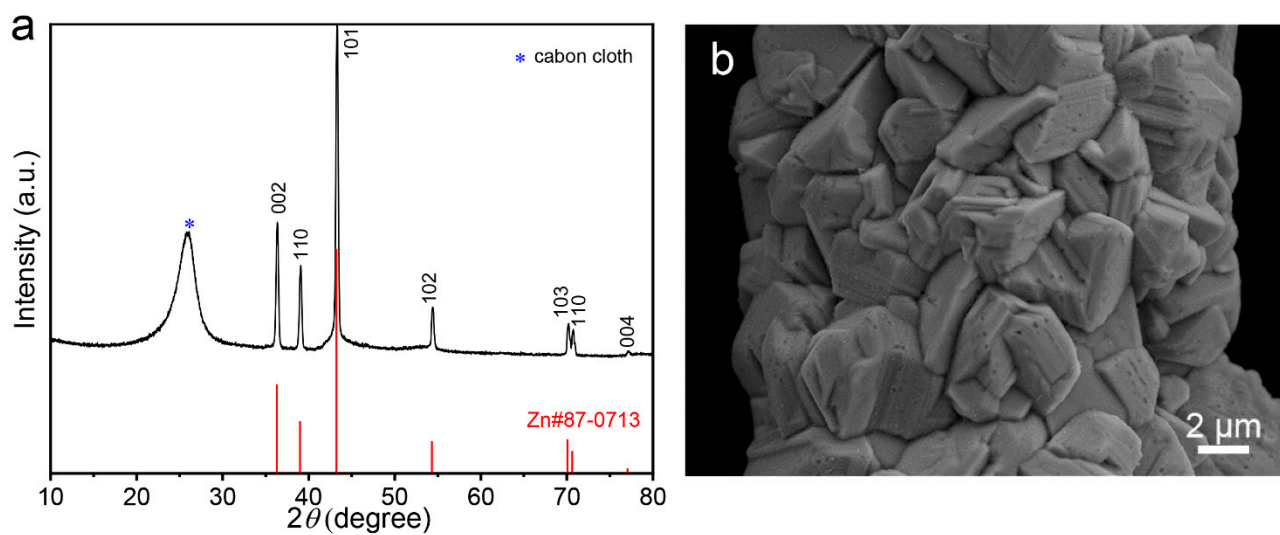

**Figure S10** (.a) XRD pattern and (b) FESEM image of the Zn/carbon cloth electrode.

**Table S1.** Fractional atomic parameters of 5%Ag-MnO<sub>2</sub> with I4/m space group.

| atom | site | x      | y      | z   | occupancy |
|------|------|--------|--------|-----|-----------|
| Mn   | 8h   | 0.3325 | 0.1481 | 0.5 | 0.9       |
| Ag   | 8h   | 0.3313 | 0.1466 | 0.5 | 0.1       |
| O1   | 8h   | 0.1717 | 0.1349 | 0   | 1         |
| O2   | 8h   | 0.4763 | 0.1859 | 0   | 1         |

**Table S2.** Cycling performance of 5%Ag-MnO<sub>2</sub> compared with reported Mn-based cathodes for ZIBs.

| Cathodes                                 | Discharge capacity (mA h g <sup>-1</sup> )/ | Capacity retention (%) /                    | Reference        |
|------------------------------------------|---------------------------------------------|---------------------------------------------|------------------|
|                                          | Current density (A g <sup>-1</sup> )        | Cycles/Current density (A g <sup>-1</sup> ) |                  |
| $\alpha$ -MnO <sub>2</sub> @C            | 272/0.066                                   | 69/50/0.066                                 | [S1]             |
| $\beta$ -MnO <sub>2</sub>                | 312/0.033                                   | 75/200/0.2                                  | [S2]             |
| $\beta$ -MnO <sub>2</sub>                | 375/0.1                                     | 49/1000/0.2                                 | [S3]             |
| ZnMn <sub>2</sub> O <sub>4</sub>         | 120/0.05                                    | 94/500/0.5                                  | [S4]             |
| MnO@NGS                                  | 288/0.1                                     | 98/300/0.5                                  | [S5]             |
| $\alpha$ -Mn <sub>2</sub> O <sub>3</sub> | 148/0.1                                     | 51/2000/2                                   | [S6]             |
| Mn <sub>3</sub> O <sub>4</sub>           | 239/0.1                                     | 73/300/0.5                                  | [S7]             |
| Amorphous Mn <sub>x</sub> O <sub>y</sub> | 226/0.1                                     | 57/200/0.1                                  | [S8]             |
| V-doped MnO <sub>2</sub>                 | 266/0.066                                   | 49/100/0.066                                | [S9]             |
| Fe-doped MnO <sub>2</sub>                | 270/0.1                                     | 84/100/0.1                                  | [S10]            |
| Ce-doped MnO <sub>2</sub>                | 258/0.15                                    | 60/100/1.54                                 | [S11]            |
| N-doped MnO <sub>2</sub>                 | 183/0.5                                     | 83/1000/5                                   | [S12]            |
| <b>Ag-doped MnO<sub>2</sub></b>          | <b>315/0.05</b>                             | <b>94/500/0.5</b>                           | <b>This work</b> |

**Table S3.** Cycling performance of our flexible quasi-solid-state ZIB compared with other flexible quasi-solid-state aqueous ZIBs.

| Cathodes                             | Electrolyte | Specific capacity (mA h g <sup>-1</sup> )/                              | Reference        |
|--------------------------------------|-------------|-------------------------------------------------------------------------|------------------|
|                                      |             | Capacity retention (%) /<br>Cycles/Current density (A g <sup>-1</sup> ) |                  |
| MnO <sub>2</sub> @CNT                | gum         | 127/-/1000/1                                                            | [S13]            |
| MnO <sub>2</sub> @CNT                | PVA         | -/75/300/-                                                              | [S14]            |
| ZnHCF@MnO <sub>2</sub>               | PVA         | -/71/500/0.4                                                            | [S15]            |
| MoS <sub>2</sub> @CC                 | Starch/PAM  | -/97/500/1                                                              | [S16]            |
| LiMn <sub>2</sub> O <sub>4</sub> @SS | gelatin     | 99/90/100/0.025                                                         | [S17]            |
| <b>Ag-MnO<sub>2</sub>@GP</b>         | <b>PAM</b>  | <b>171/73/600/1</b>                                                     | <b>This work</b> |

## Reference

- S1. Islam, S.; Alfuruqi, M.H.; Song, J.; Kim, S.; Pham, D.T.; Jo, J.; Kim, S.; Mathew, V.; Baboo, J.P.; Xiu, Z.; et al. Carbon-coated manganese dioxide nanoparticles and their enhanced electrochemical properties for zinc-ion battery applications. *J. Energy Chem.* **2017**, *26*, 815-819, doi:https://doi.org/10.1016/j.jechem.2017.04.002.
- S2. Islam, S.; Alfuruqi, M.H.; Mathew, V.; Song, J.; Kim, S.; Kim, S.; Jo, J.; Baboo, J.P.; Pham, D.T.; Putro, D.Y.; et al. Facile synthesis and the exploration of the zinc storage mechanism of  $\beta$ -MnO<sub>2</sub> nanorods with exposed (101) planes as a novel cathode material for high performance eco-friendly zinc-ion batteries. *J. Mater. Chem. A* **2017**, *5*, 23299-23309, doi:10.1039/C7TA07170A.
- S3. Liu, W.; Zhang, X.; Huang, Y.; Jiang, B.; Chang, Z.; Xu, C.; Kang, F.  $\beta$ -MnO<sub>2</sub> with proton conversion mechanism in rechargeable zinc ion battery. *J. Energy Chem.* **2021**, *56*, 365-373, doi:https://doi.org/10.1016/j.jechem.2020.07.027.
- S4. Zhang, N.; Cheng, F.; Liu, Y.; Zhao, Q.; Lei, K.; Chen, C.; Liu, X.; Chen, J. Cation-Deficient Spinel ZnMn<sub>2</sub>O<sub>4</sub> Cathode in Zn(CF<sub>3</sub>SO<sub>3</sub>)<sub>2</sub> Electrolyte for Rechargeable Aqueous Zn-Ion Battery. *J. Am. Chem. Soc.* **2016**, *138*, 12894-12901, doi:10.1021/jacs.6b05958.
- S5. Li, W.; Gao, X.; Chen, Z.; Guo, R.; Zou, G.; Hou, H.; Deng, W.; Ji, X.; Zhao, J. Electrochemically activated MnO cathodes for high performance aqueous zinc-ion battery. *Chem. Eng. J.* **2020**, *402*, 125509, doi:https://doi.org/10.1016/j.cej.2020.125509.
- S6. Jiang, B.; Xu, C.; Wu, C.; Dong, L.; Li, J.; Kang, F. Manganese Sesquioxide as Cathode Material for Multivalent Zinc Ion Battery with High Capacity and Long Cycle Life. *Electrochim. Acta* **2017**, *229*, 422-428, doi:https://doi.org/10.1016/j.electacta.2017.01.163.
- S7. Hao, J.; Mou, J.; Zhang, J.; Dong, L.; Liu, W.; Xu, C.; Kang, F. Electrochemically induced spinel-layered phase transition of Mn<sub>3</sub>O<sub>4</sub> in high performance neutral aqueous rechargeable zinc battery. *Electrochim. Acta* **2018**, *259*, 170-178, doi:https://doi.org/10.1016/j.electacta.2017.10.166.
8. Wu, Y.; Fee, J.; Tobin, Z.; Shirazi-Amin, A.; Kerns, P.; Dissanayake, S.; Mirich, A.; Suib, S.L. Amorphous Manganese Oxides: An Approach for Reversible Aqueous Zinc-Ion Batteries. *ACS Appl. Energy Mater.* **2020**, *3*, 1627-1633, doi:10.1021/acsaem.9b02119.
- S9. Alfuruqi, M.H.; Islam, S.; Mathew, V.; Song, J.; Kim, S.; Tung, D.P.; Jo, J.; Kim, S.; Baboo, J.P.; Xiu, Z.; et al. Ambient redox synthesis of vanadium-doped manganese dioxide nanoparticles and their enhanced zinc storage properties. *Appl. Surf. Sci.* **2017**, *404*, 435-442, doi:https://doi.org/10.1016/j.apsusc.2017.02.009.
- S10. Xu, J.-W.; Gao, Q.-L.; Xia, Y.-M.; Lin, X.-S.; Liu, W.-L.; Ren, M.-M.; Kong, F.-G.; Wang, S.-J.; Lin, C. High-performance reversible aqueous zinc-ion battery based on iron-doped alpha-manganese dioxide coated by polypyrrole. *J. Colloid Interface Sci.* **2021**, *598*, 419-429, doi:https://doi.org/10.1016/j.jcis.2021.04.057.
- S11. Wang, J.; Sun, X.; Zhao, H.; Xu, L.; Xia, J.; Luo, M.; Yang, Y.; Du, Y. Superior-Performance Aqueous Zinc Ion Battery Based on Structural Transformation of MnO<sub>2</sub> by Rare Earth Doping. *J. Phys. Chem. C* **2019**, *123*, 22735-22741, doi:10.1021/acs.jpcc.9b05535.
- S12. Zhang, Y.; Liu, Y.; Liu, Z.; Wu, X.; Wen, Y.; Chen, H.; Ni, X.; Liu, G.; Huang, J.; Peng, S. MnO<sub>2</sub> cathode materials with the improved stability via nitrogen doping for aqueous zinc-ion batteries. *J. Energy Chem.* **2022**, *64*, 23-32, doi:https://doi.org/10.1016/j.jechem.2021.04.046.
- S13. Zhang, S.; Yu, N.; Zeng, S.; Zhou, S.; Chen, M.; Di, J.; Li, Q. An adaptive and stable bio-electrolyte for rechargeable Zn-ion batteries. *J. Mater. Chem. A* **2018**, *6*, 12237-12243, doi:10.1039/C8TA04298E.
- S14. Wang, K.; Zhang, X.; Han, J.; Zhang, X.; Sun, X.; Li, C.; Liu, W.; Li, Q.; Ma, Y. High-Performance Cable-Type Flexible Rechargeable Zn Battery Based on MnO<sub>2</sub>@CNT Fiber Microelectrode. *ACS Appl. Mater. Interfaces.* **2018**, *10*, 24573-24582, doi:10.1021/acsaami.8b07756.
- S15. Lu, K.; Song, B.; Zhang, Y.; Ma, H.; Zhang, J. Encapsulation of zinc hexacyanoferrate nanocubes with manganese oxide nanosheets for high-performance rechargeable zinc ion batteries. *J. Mater. Chem. A* **2017**, *5*, 23628-23633, doi:10.1039/C7TA07834J.
- S16. Li, H.; Yang, Q.; Mo, F.; Liang, G.; Liu, Z.; Tang, Z.; Ma, L.; Liu, J.; Shi, Z.; Zhi, C. MoS<sub>2</sub> nanosheets with expanded

interlayer spacing for rechargeable aqueous Zn-ion batteries. *Energy Storage Mater.* **2019**, *19*, 94-101, doi:<https://doi.org/10.1016/j.ensm.2018.10.005>.

- S17. Han, Q.; Chi, X.; Zhang, S.; Liu, Y.; Zhou, B.; Yang, J.; Liu, Y. Durable, flexible self-standing hydrogel electrolytes enabling high-safety rechargeable solid-state zinc metal batteries. *J. Mater. Chem. A* **2018**, *6*, 23046-23054, doi:10.1039/C8TA08314B.
